# Supplementary material
Source: publisher figshare collection journal article supplement (https://tandf.figshare.com/ndownloader/files/22714778)

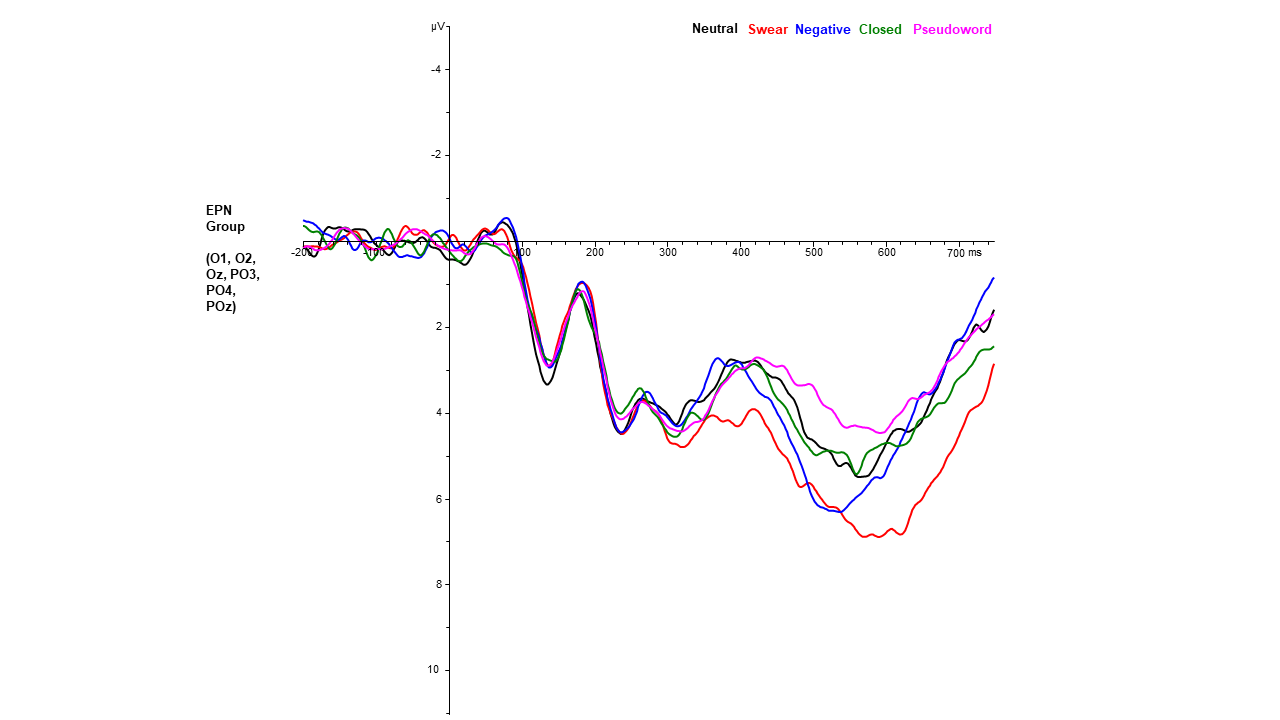


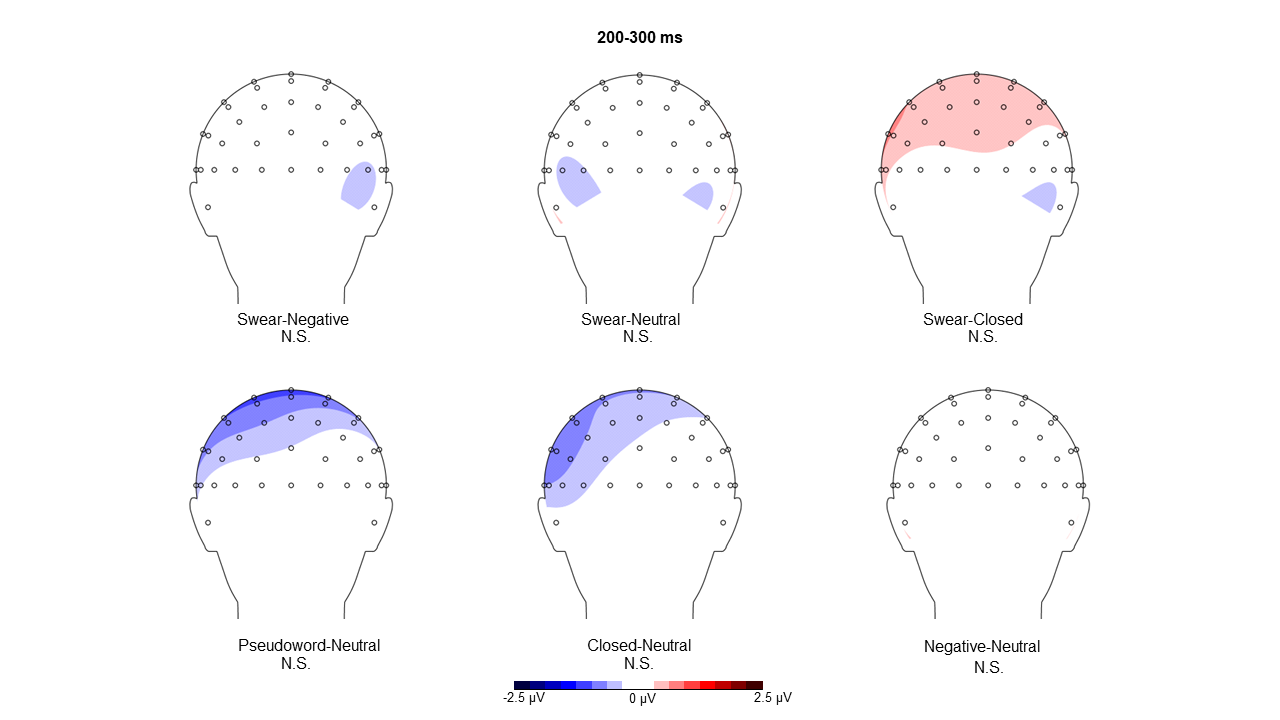

Supplement: Supplementary file 1 [file 22714778]
